# Supplementary material
Source: MDPI journal article supplement (https://www.mdpi.com/2073-4352/14/2/144)
Supplement: s1 [file s1]

**Electronic Supplementary material for**  
**SYNTHESIS OF NEW ZINC AND COPPER COORDINATION POLYMERS**  
**DERIVED FROM bis (TRIAZOLE) LIGANDS**

Maria Cristina Al-Matarneh<sup>1\*</sup>, Alina Nicolescu<sup>2\*</sup>, Ioan-Andrei Dascalu<sup>1</sup>, Sergiu Shova<sup>3</sup>,  
Cristian-Dragos Varganici<sup>1</sup>, Adrian Fifere<sup>1</sup>, Ramona Danac<sup>4</sup>, Ioana-Cristina Marinas<sup>5</sup>.

\*almatarneh.cristina@icmpp.ro, alina@icmpp.ro

<sup>1</sup>*Center of Advanced Research in Bionanoconjugates and Biopolymers, "Petru Poni" Institute of  
Macromolecular Chemistry of Romanian Academy, 41A Grigore  
Ghica Voda Alley, Iasi 700487, Romania*

<sup>2</sup>*NMR Laboratory, "Petru Poni" Institute of Macromolecular Chemistry of Romanian Academy,  
41A Grigore Ghica Voda Alley, Iasi 700487, Romania*

<sup>3</sup>*Department of Inorganic Polymers, "Petru Poni" Institute of Macromolecular Chemistry of  
Romanian Academy, 41A Grigore Ghica Voda Alley, Iasi 700487, Romania*

<sup>4</sup>*Faculty of Chemistry, Alexandru Ioan Cuza University of Iasi, , 11 Carol I Bvd., Iasi 700506,  
Romania*

<sup>5</sup>*Research and Development Department , SC Sanimed International Impex SRL, 6 Bucharest-  
Giurgiu street, 087040, Giurgiu, Romania;*

| <b>Table of contents</b>                                                                                                                                                                                                                                                                                                                                                                                                     |                   |
|------------------------------------------------------------------------------------------------------------------------------------------------------------------------------------------------------------------------------------------------------------------------------------------------------------------------------------------------------------------------------------------------------------------------------|-------------------|
| <b>1.</b> FT-IR spectra of ligand L <sup>1</sup> and complexes [CuL <sup>1</sup> (NO <sub>3</sub> ) <sub>2</sub> ] <sub>n</sub> and [ZnL <sup>1</sup> (NO <sub>3</sub> ) <sub>2</sub> ] <sub>n</sub>                                                                                                                                                                                                                         | <b>Figure S1</b>  |
| <b>2.</b> FT-IR spectra of ligand L <sup>2</sup> and complex [CuL <sup>2</sup> NO <sub>3</sub> ] <sub>n</sub> .                                                                                                                                                                                                                                                                                                              | <b>Figure S2</b>  |
| <b>3.</b> <sup>1</sup> H-NMR spectrum corresponding to compound L <sup>1</sup> , recorded in CDCl <sub>3</sub> , at 600.1 MHz. Signals assignments are annotated on the figure.                                                                                                                                                                                                                                              | <b>Figure S3</b>  |
| <b>4.</b> <sup>13</sup> C-NMR spectrum corresponding to compound L <sup>1</sup> , recorded in CDCl <sub>3</sub> , at 150.9 MHz. Signals assignments are annotated on the figure.                                                                                                                                                                                                                                             | <b>Figure S4</b>  |
| <b>5.</b> H,H-NOESY spectrum recorded for compound L <sup>1</sup> , with the insert showing the NOE correlation signals between 1,2,3-triazole proton and methoxy and butyl protons.                                                                                                                                                                                                                                         | <b>Figure S5</b>  |
| <b>6.</b> Detailed spectral region of <sup>1</sup> H, <sup>15</sup> N-HMBC spectrum corresponding to compound L <sup>1</sup> , showing the proton-nitrogen two and three bonds couplings used to determine the chemical shifts values for nitrogen atoms.                                                                                                                                                                    | <b>Figure S6</b>  |
| <b>7.</b> <sup>1</sup> H-NMR spectrum corresponding to compound L <sup>2</sup> , recorded in CDCl <sub>3</sub> , at 600.1 MHz. Signals assignments are annotated on the figure.                                                                                                                                                                                                                                              | <b>Figure S7</b>  |
| <b>8.</b> <sup>13</sup> C-NMR spectrum corresponding to compound L <sup>2</sup> , recorded in CDCl <sub>3</sub> , at 100.6 MHz.                                                                                                                                                                                                                                                                                              | <b>Figure S8</b>  |
| <b>9.</b> Detailed spectral region of <sup>1</sup> H, <sup>15</sup> N-HMBC spectrum corresponding to compound L <sup>2</sup> , showing the proton-nitrogen two and three bounds couplings used to determine the chemical shifts values for nitrogen atoms.                                                                                                                                                                   | <b>Figure S9</b>  |
| <b>10.</b> <sup>1</sup> H-NMR spectrum corresponding to bisazide 2, recorded in CDCl <sub>3</sub> , at 600.1 MHz. Signals assignments are annotated on the figure.                                                                                                                                                                                                                                                           | <b>Figure S10</b> |
| <b>11.</b> <sup>13</sup> C-NMR spectrum corresponding to bisazide 2, recorded in CDCl <sub>3</sub> , at 100.6 MHz.                                                                                                                                                                                                                                                                                                           | <b>Figure S11</b> |
| <b>12.</b> Overlapped <sup>1</sup> H-NMR spectra recorded at 400.1 MHz, in DMSO-d <sub>6</sub> , for free L <sup>1</sup> (a), [ZnL <sup>1</sup> (NO <sub>3</sub> ) <sub>2</sub> ] <sub>n</sub> complex (b) and [CuL <sup>1</sup> (NO <sub>3</sub> ) <sub>2</sub> ] <sub>n</sub> complex (c). For copper complex, significant line broadening causing the modification of splitting patterns is observed for all the signals. | <b>Figure S12</b> |
| <b>13.</b> Overlapped <sup>13</sup> C-NMR spectra recorded at 100.6 MHz, in DMSO-d <sub>6</sub> , for free L <sup>1</sup> (a), [ZnL <sup>1</sup> (NO <sub>3</sub> ) <sub>2</sub> ] <sub>n</sub> complex (b) and                                                                                                                                                                                                              | <b>Figure S13</b> |

|                                                                                                                                                                                                                                                                                                                            |                    |
|----------------------------------------------------------------------------------------------------------------------------------------------------------------------------------------------------------------------------------------------------------------------------------------------------------------------------|--------------------|
| [CuL <sup>1</sup> (NO <sub>3</sub> ) <sub>2</sub> ] <sub>n</sub> complex (c). For copper complex, significant line broadening is observed for 1,2,3-triazole cycle carbons.                                                                                                                                                |                    |
| <b>14.</b> Overlapped <sup>1</sup> H-NMR spectra recorded at 400.1 MHz, in DMSO-d <sub>6</sub> , for free L <sup>2</sup> (a) and [CuL <sup>2</sup> NO <sub>3</sub> ] <sub>n</sub> complex (b). For copper complex, significant line broadening causing the modification of splitting patterns is observed for two signals. | <b>Figure S14</b>  |
| <b>15.</b> Bond distances (Å) and angles (°) for [CuL <sup>2</sup> NO <sub>3</sub> ] <sub>n</sub> complex, [ZnL <sup>1</sup> (NO <sub>3</sub> ) <sub>2</sub> ] <sub>n</sub> complex, L <sup>1</sup> ligand, [CuL <sup>1</sup> (NO <sub>3</sub> ) <sub>2</sub> ] <sub>n</sub> complex, L <sup>2</sup> ligand.               | <b>Table S1</b>    |
| <b>16.</b> Powder XRD for [CuL <sup>1</sup> (NO <sub>3</sub> ) <sub>2</sub> ] <sub>n</sub> complex.                                                                                                                                                                                                                        | <b>Figure S15</b>  |
| <b>17.</b> TG-DTG curves of bisazide 2.                                                                                                                                                                                                                                                                                    | <b>Figure S16</b>  |
| <b>18.</b> TG-DTG curves of ligand L <sup>1</sup>                                                                                                                                                                                                                                                                          | <b>Figure S17</b>  |
| <b>19.</b> TG-DTG curves of ligand L <sup>2</sup>                                                                                                                                                                                                                                                                          | <b>Figure S18</b>  |
| <b>20.</b> TG-DTG curves of [CuL <sup>1</sup> (NO <sub>3</sub> ) <sub>2</sub> ] <sub>n</sub>                                                                                                                                                                                                                               | <b>Figure S19</b>  |
| <b>21.</b> TG-DTG curves of [ZnL <sup>1</sup> (NO <sub>3</sub> ) <sub>2</sub> ] <sub>n</sub>                                                                                                                                                                                                                               | <b>Figure S20</b>  |
| <b>22.</b> Data extracted from TG-DTG experiments.                                                                                                                                                                                                                                                                         | <b>Table S2</b>    |
| <b>23.</b> Maldi-MS spectrum of bisazide 2.                                                                                                                                                                                                                                                                                | <b>Figure S21</b>  |
| <b>24.</b> Maldi-MS spectrum of L <sup>1</sup> .                                                                                                                                                                                                                                                                           | <b>Figure S22</b>  |
| <b>25.</b> Maldi-MS spectrum of L <sup>2</sup> .                                                                                                                                                                                                                                                                           | <b>Figure S23</b>  |
| <b>26.</b> Maldi-MS spectrum of [CuL <sup>1</sup> (NO <sub>3</sub> ) <sub>2</sub> ] <sub>n</sub> .                                                                                                                                                                                                                         | <b>Figure S24</b>  |
| <b>27.</b> Maldi-MS spectrum of [ZnL <sup>1</sup> (NO <sub>3</sub> ) <sub>2</sub> ] <sub>n</sub>                                                                                                                                                                                                                           | <b>Figure S25</b>  |
| <b>28.</b> XPS spectra of [CuL <sup>1</sup> (NO <sub>3</sub> ) <sub>2</sub> ] <sub>n</sub> , full scan, C1s, N1s, O1s and Cu2p (in this order).                                                                                                                                                                            | <b>Figure S26.</b> |
| <b>29.</b> XPS spectra of [ZnL <sup>1</sup> (NO <sub>3</sub> ) <sub>2</sub> ] <sub>n</sub> , full scan, C1s, N1s, O1s and Zn2p (in this order).                                                                                                                                                                            | <b>Figure S27</b>  |

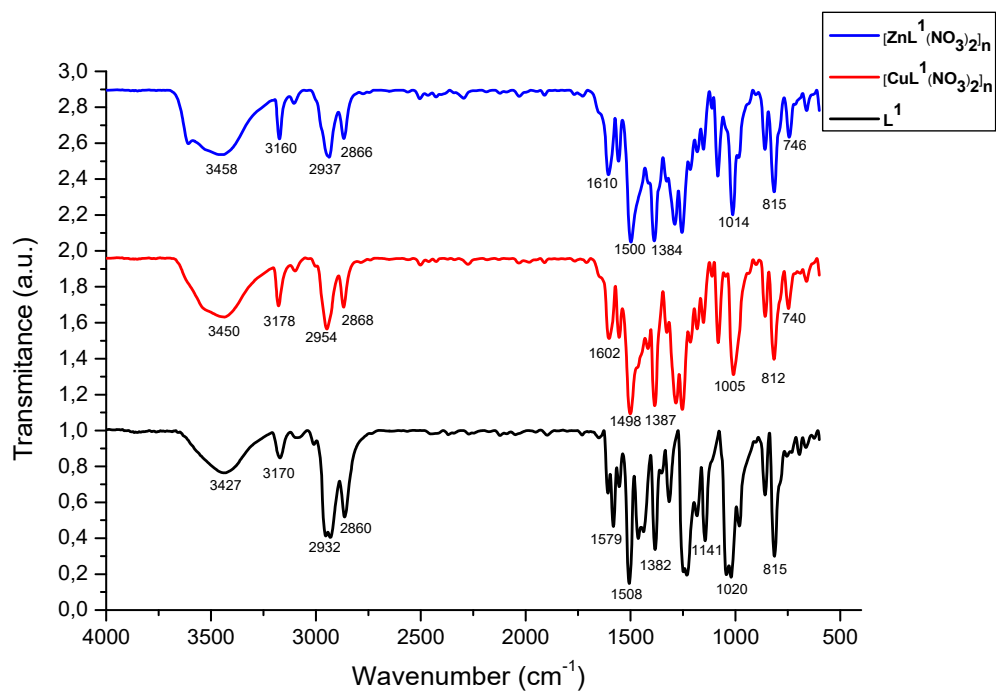

**Figure S1.** FT-IR spectra of ligand  $L^1$ ,  $[CuL^1(NO_3)_2]_n$  and  $[ZnL^1(NO_3)_2]_n$

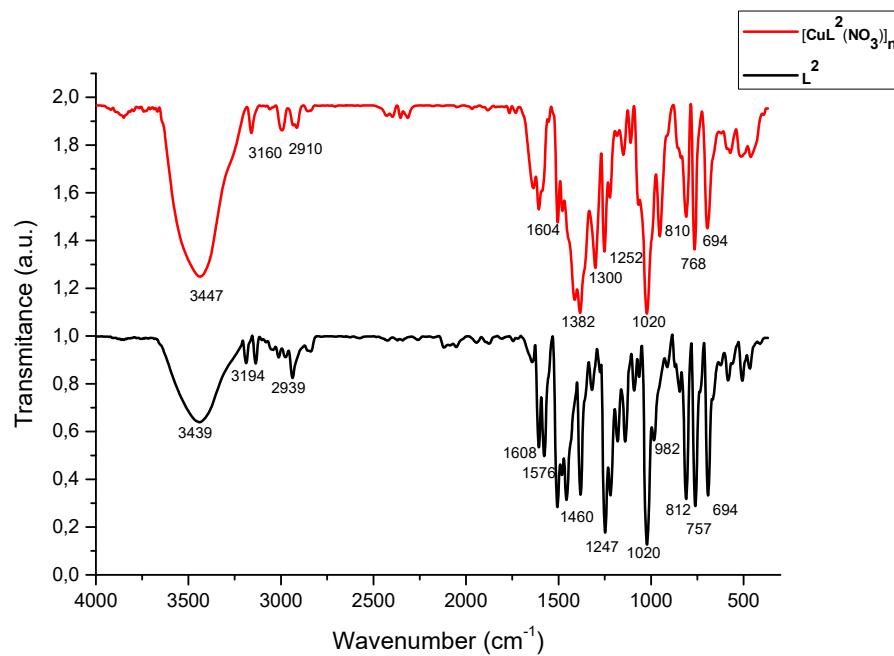

**Figure S2.** FT-IR spectra of ligand  $L^2$  and  $[CuL^2NO_3]_n$  complex.

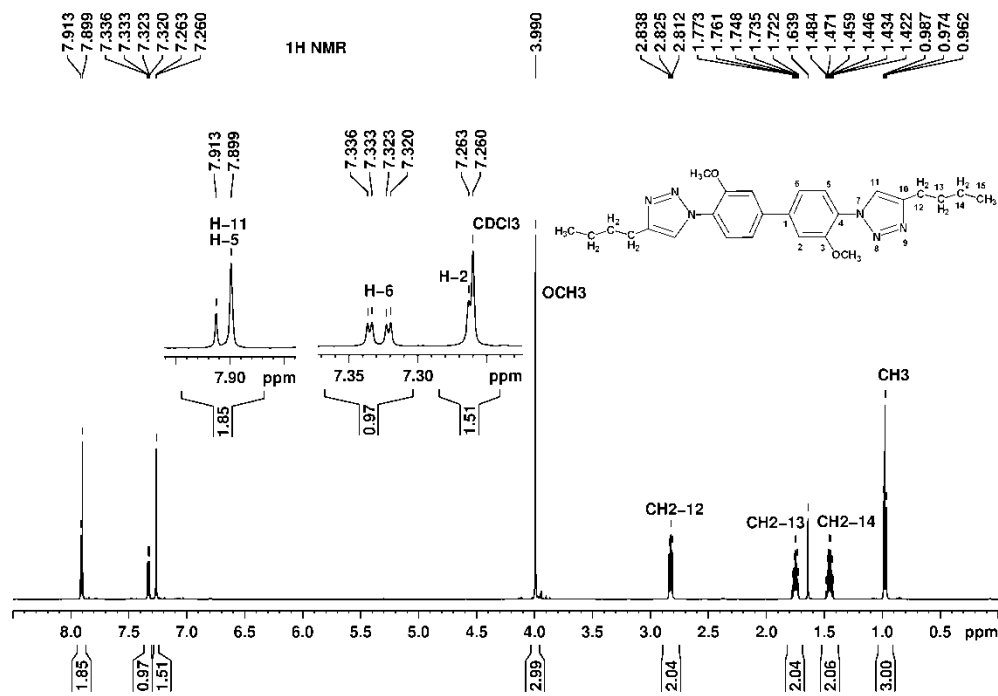

**Figure S3.** <sup>1</sup>H-NMR spectrum corresponding to compound **L<sup>1</sup>**, recorded in CDCl<sub>3</sub>, at 600.1 MHz. Signals assignments are annotated on the figure.

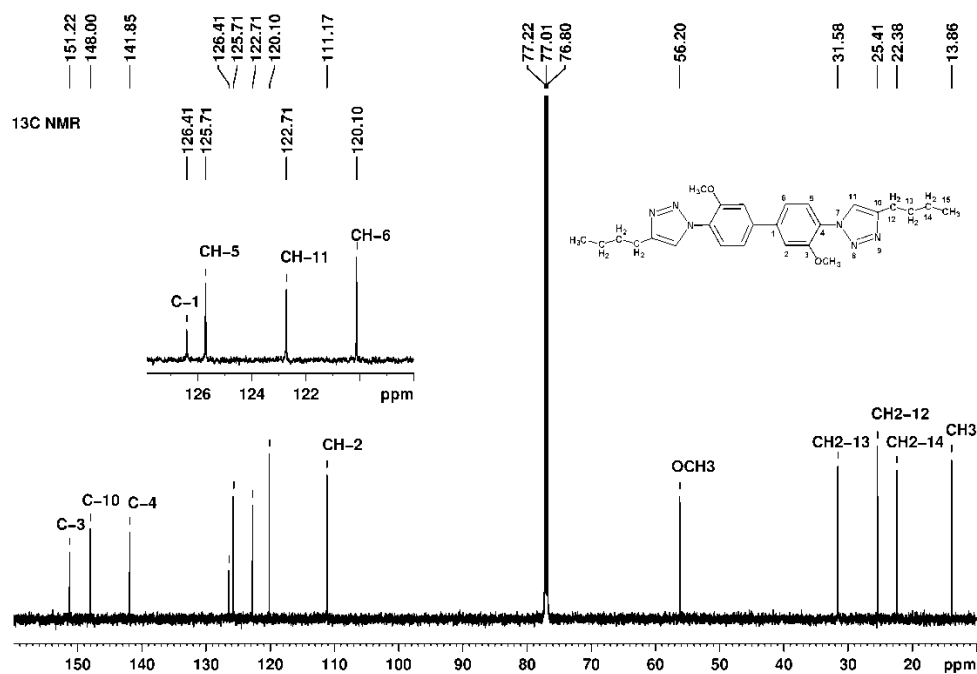

**Figure S4.** <sup>13</sup>C-NMR spectrum corresponding to compound **L<sup>1</sup>**, recorded in CDCl<sub>3</sub>, at 150.9 MHz. Signals assignments are annotated on the figure.

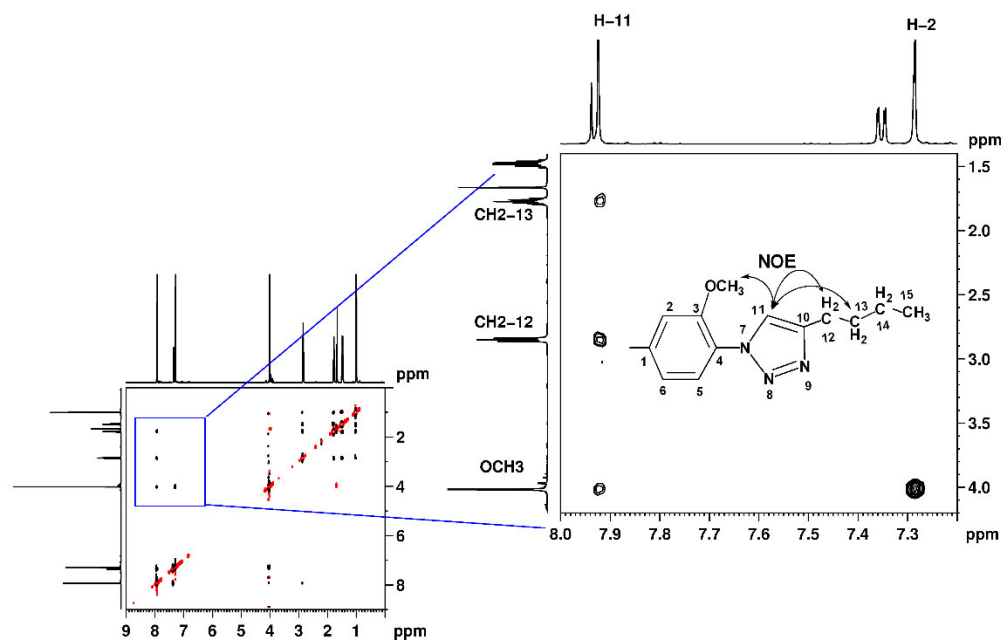

**Figure S5.**  $^1\text{H}$ , $^1\text{H}$ -NOESY spectrum recorded for compound  $\text{L}^1$ , with the insert showing the NOE correlation signals between 1,2,3-triazole proton and methoxy and butyl protons.

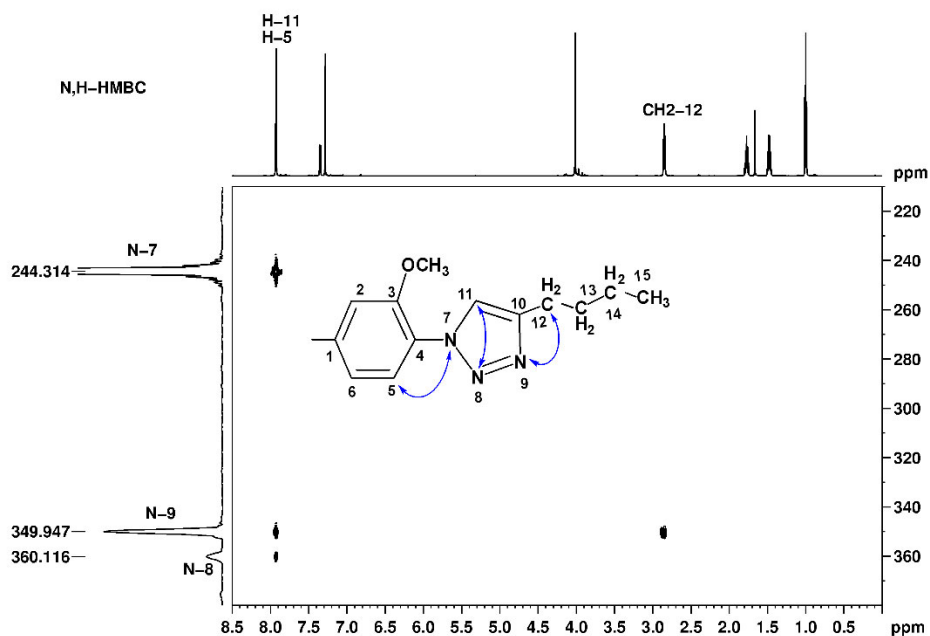

**Figure S6.** Detailed spectral region of  $^1\text{H}$ , $^{15}\text{N}$ -HMBC spectrum corresponding to compound  $\text{L}^1$ , showing the proton-nitrogen two and three bonds couplings used to determine the chemical shifts values for nitrogen atoms.

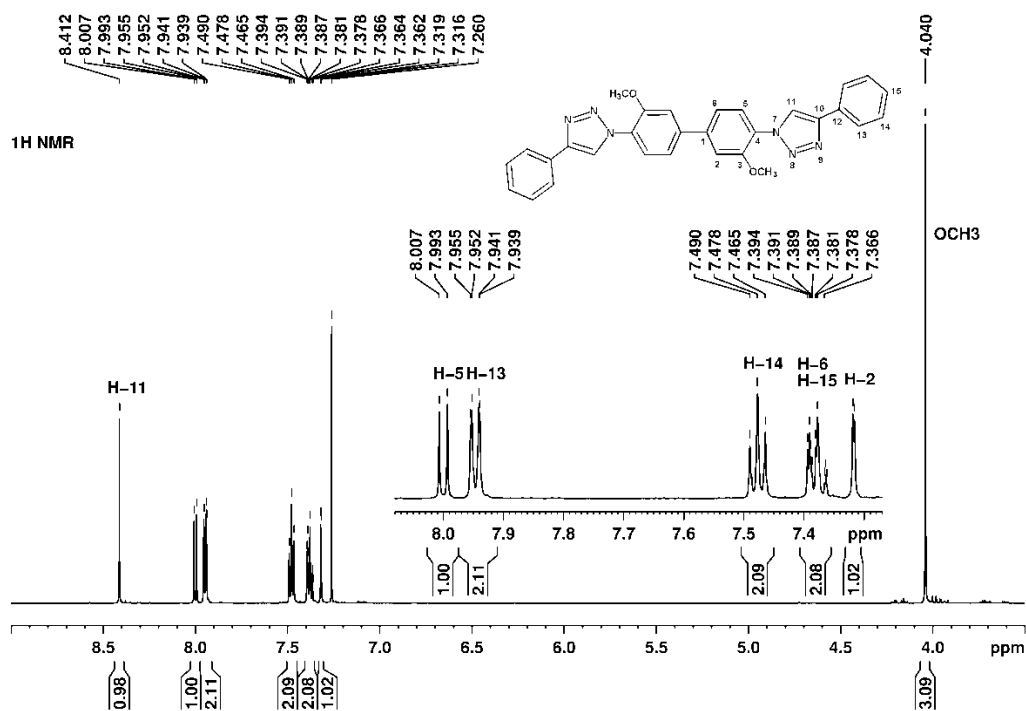

**Figure S7.** <sup>1</sup>H-NMR spectrum corresponding to compound **L<sup>2</sup>**, recorded in CDCl<sub>3</sub>, at 600.1 MHz. Signals assignments are annotated on the figure.

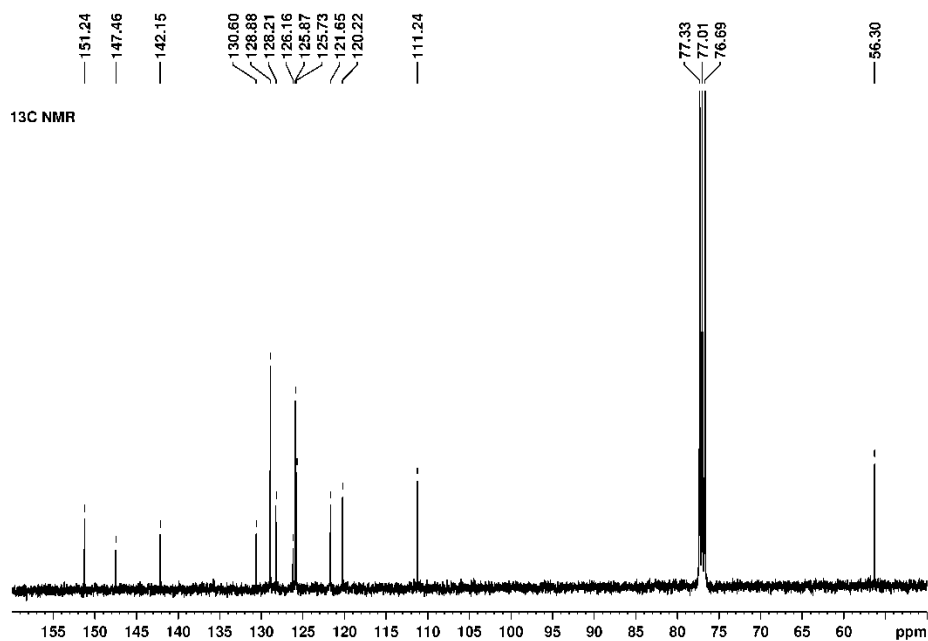

**Figure S8.** <sup>13</sup>C-NMR spectrum corresponding to compound **L<sup>2</sup>**, recorded in CDCl<sub>3</sub>, at 100.6 MHz.

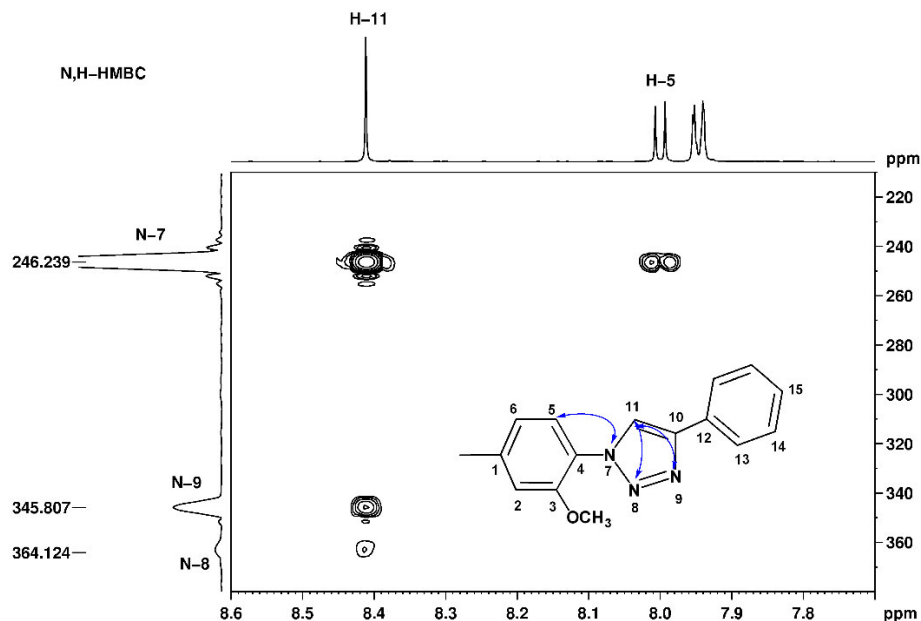

**Figure S9.** Detailed spectral region of  $^1\text{H}$ ,  $^{15}\text{N}$ -HMBC spectrum corresponding to compound **L<sup>2</sup>**, showing the proton-nitrogen two and three bounds couplings used to determine the chemical shifts values for nitrogen atoms.

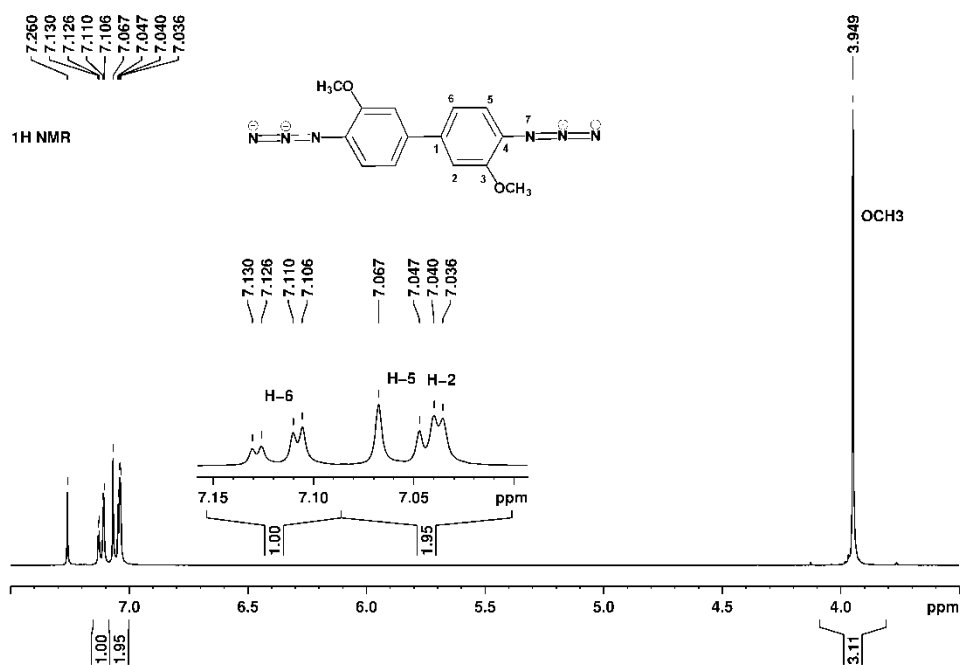

**Figure S10.**  $^1\text{H}$ -NMR spectrum corresponding to bisazide **2**, recorded in  $\text{CDCl}_3$ , at 600.1 MHz. Signals assignments are annotated on the figure.



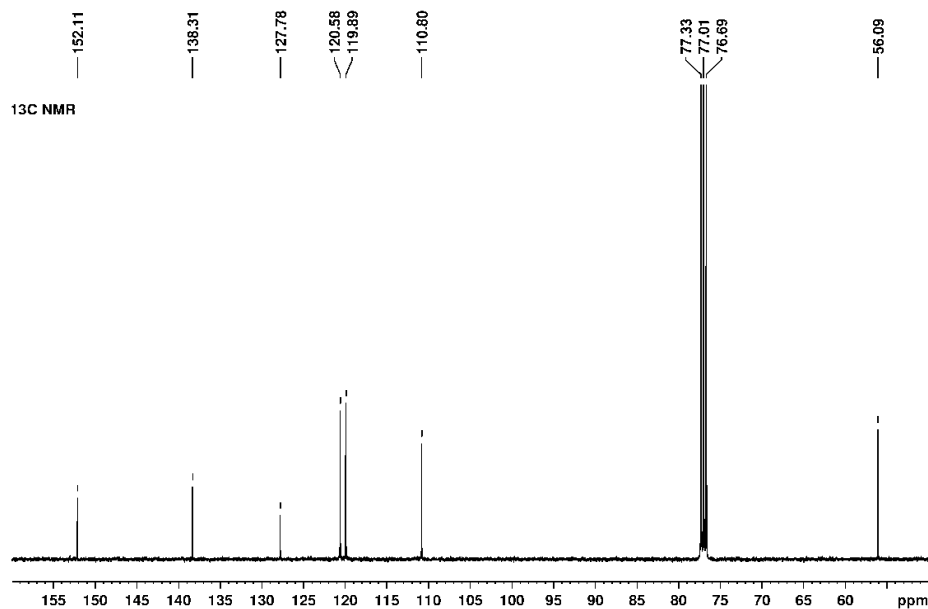

**Figure S11.** <sup>13</sup>C-NMR spectrum corresponding to bisazide **2**, recorded in CDCl<sub>3</sub>, at 100.6 MHz.

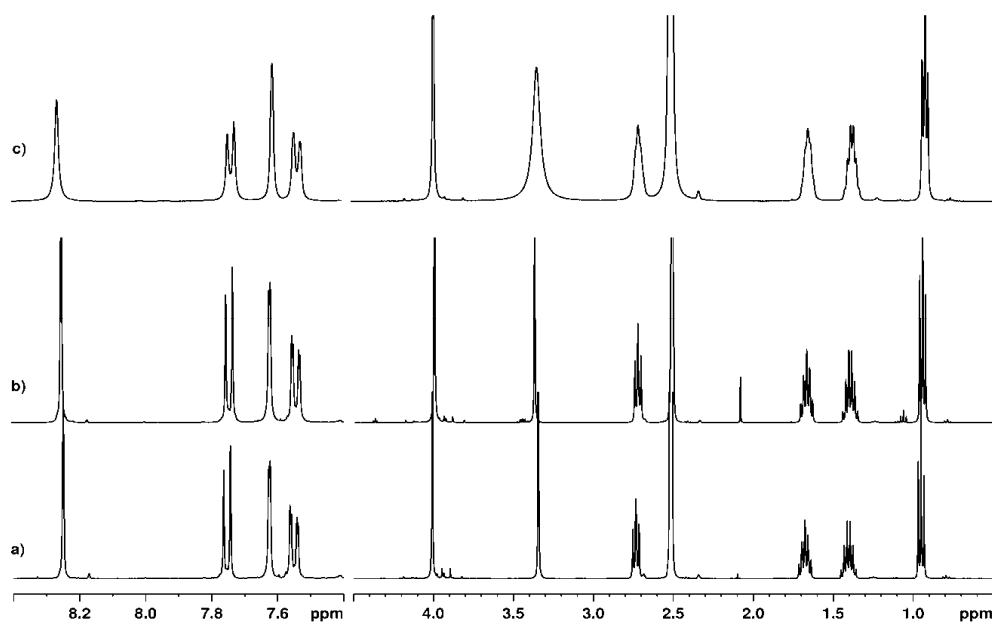

**Figure S12.** Overlapped <sup>1</sup>H-NMR spectra recorded at 400.1 MHz, in DMSO-d<sub>6</sub>, for free L<sup>1</sup> (a), [ZnL<sup>1</sup>(NO<sub>3</sub>)<sub>2</sub>]<sub>n</sub> complex (b) and [CuL<sup>1</sup>(NO<sub>3</sub>)<sub>2</sub>]<sub>n</sub> complex (c). For copper complex, significant line broadening causing the modification of splitting patterns is observed for all the signals.

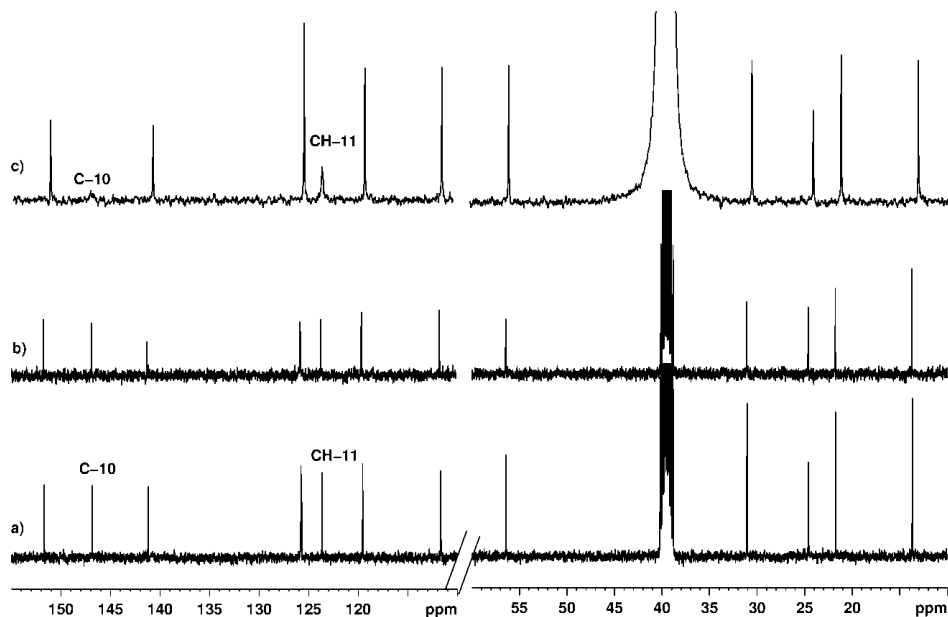

**Figure S13.** Overlapped  $^{13}\text{C}$ -NMR spectra recorded at 100.6 MHz, in  $\text{DMSO-d}_6$ , for free  $\text{L}^1$  (a),  $[\text{ZnL}^1(\text{NO}_3)_2]_n$  complex (b) and  $[\text{CuL}^1(\text{NO}_3)_2]_n$  complex (c). For copper complex, significant line broadening is observed for 1,2,3-triazole cycle carbons.

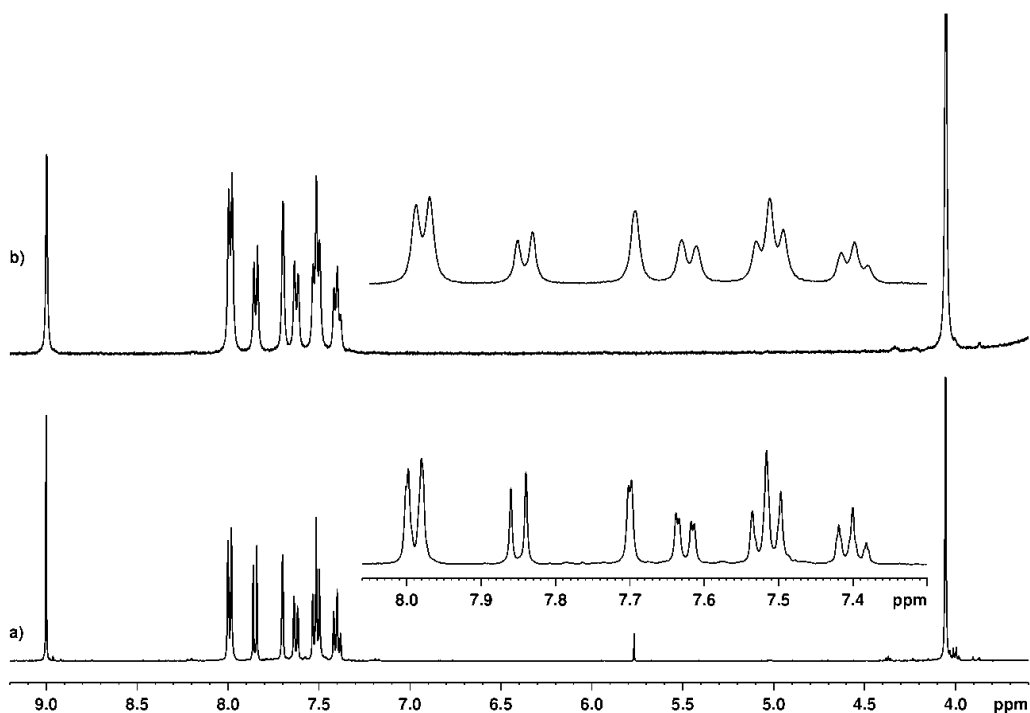

**Figure S14.** Overlapped  $^1\text{H}$ -NMR spectra recorded at 400.1 MHz, in  $\text{DMSO-d}_6$ , for free  $\text{L}^2$  (a) and  $[\text{CuL}^2\text{NO}_3]$  complex (b). For copper complex, significant line broadening causing the modification of splitting patterns is observed for two signals.

**Table S1.** Bond distances (Å) and angles (°)**[CuL<sup>2</sup>NO<sub>3</sub>]<sub>n</sub> complex**

|                    |          |                      |          |
|--------------------|----------|----------------------|----------|
| C1-C2              | 1.378(6) | C19-C19 <sup>2</sup> | 1.492(8) |
| C1-C6              | 1.393(5) | C19-C20              | 1.395(6) |
| C1-N3              | 1.431(5) | C20-C21              | 1.372(6) |
| C2-C3              | 1.365(6) | C21-O2               | 1.368(5) |
| C3-C4              | 1.380(6) | C22-O2               | 1.407(5) |
| C4-C4 <sup>1</sup> | 1.478(8) | C23-C24              | 1.355(6) |
| C4-C5              | 1.398(5) | C23-N6               | 1.345(5) |
| C5-C6              | 1.381(6) | C24-C25              | 1.479(6) |
| C6-O1              | 1.349(5) | C24-N4               | 1.362(5) |
| C7-O1              | 1.443(5) | C25-C26              | 1.377(7) |
| C8-C9              | 1.361(6) | C25-C30              | 1.391(6) |
| C8-N3              | 1.351(5) | C26-C27              | 1.380(7) |
| C9-C10             | 1.475(6) | C27-C28              | 1.381(8) |
| C9-N1              | 1.367(5) | C28-C29              | 1.370(8) |
| C10-C11            | 1.391(6) | C29-C30              | 1.374(7) |
| C10-C15            | 1.369(6) | Cu1-N1               | 1.908(4) |
| C11-C12            | 1.372(7) | Cu1-N4               | 1.933(3) |
| C12-C13            | 1.368(8) | Cu1-O3               | 2.140(5) |
| C13-C14            | 1.371(7) | N1-N2                | 1.316(5) |
| C14-C15            | 1.388(6) | N2-N3                | 1.340(5) |
| C16-C17            | 1.386(6) | N4-N5                | 1.313(5) |
| C16-C21            | 1.395(5) | N5-N6                | 1.329(5) |
| C16-N6             | 1.433(5) | N7-O3                | 1.193(6) |
| C17-C18            | 1.353(6) | N7-O4                | 1.238(6) |
| C18-C19            | 1.382(6) | N7-O5                | 1.213(6) |

Symmetry codes: <sup>1</sup>1 - x, 2 - y, - z; <sup>2</sup>1 - x, 1 - y, 3 - z

|                       |          |             |          |
|-----------------------|----------|-------------|----------|
| C2-C1-C6              | 119.4(4) | O2-C21-C16  | 115.6(4) |
| C2-C1-N3              | 117.7(4) | O2-C21-C20  | 125.9(4) |
| C6-C1-N3              | 123.0(4) | N6-C23-C24  | 105.7(4) |
| C3-C2-C1              | 121.1(4) | C23-C24-C25 | 130.2(4) |
| C2-C3-C4              | 121.6(4) | C23-C24-N4  | 106.9(4) |
| C3-C4-C4 <sup>1</sup> | 122.2(5) | N4-C24-C25  | 122.9(4) |
| C3-C4-C5              | 116.8(4) | C26-C25-C24 | 120.0(4) |
| C5-C4-C4 <sup>1</sup> | 121.0(5) | C26-C25-C30 | 119.4(4) |
| C6-C5-C4              | 122.6(4) | C30-C25-C24 | 120.6(5) |

|                          |          |             |          |
|--------------------------|----------|-------------|----------|
| C5-C6-C1                 | 118.5(4) | C27-C26-C25 | 120.7(5) |
| O1-C6-C1                 | 116.6(4) | C26-C27-C28 | 119.6(6) |
| O1-C6-C5                 | 124.9(4) | C29-C28-C27 | 119.7(5) |
| N3-C8-C9                 | 106.3(4) | C28-C29-C30 | 121.0(5) |
| C8-C9-C10                | 130.8(4) | C29-C30-C25 | 119.5(5) |
| C8-C9-N1                 | 106.6(4) | C9-N1-Cu1   | 136.9(3) |
| N1-C9-C10                | 122.5(4) | N2-N1-C9    | 110.0(3) |
| C11-C10-C9               | 118.9(4) | N2-N1-Cu1   | 113.1(3) |
| C15-C10-C9               | 122.8(4) | N1-N2-N3    | 106.8(3) |
| C15-C10-C11              | 118.3(4) | C8-N3-C1    | 132.4(3) |
| C12-C11-C10              | 120.1(5) | N2-N3-C1    | 117.3(3) |
| C13-C12-C11              | 121.5(5) | N2-N3-C8    | 110.2(4) |
| C12-C13-C14              | 118.9(5) | C24-N4-Cu1  | 132.0(3) |
| C13-C14-C15              | 120.1(6) | N5-N4-C24   | 109.9(3) |
| C10-C15-C14              | 121.2(5) | N5-N4-Cu1   | 118.0(3) |
| C17-C16-C21              | 119.4(4) | N4-N5-N6    | 106.4(3) |
| C17-C16-N6               | 118.5(4) | C23-N6-C16  | 130.3(4) |
| C21-C16-N6               | 122.0(4) | N5-N6-C16   | 118.6(3) |
| C18-C17-C16              | 120.7(4) | N5-N6-C23   | 111.0(4) |
| C17-C18-C19              | 121.7(4) | O3-N7-O4    | 120.1(6) |
| C18-C19-C19 <sup>2</sup> | 122.1(5) | O3-N7-O5    | 121.2(6) |
| C18-C19-C20              | 117.0(4) | O5-N7-O4    | 118.7(6) |
| C20-C19-C19 <sup>2</sup> | 120.9(5) | C6-O1-C7    | 118.6(4) |
| C21-C20-C19              | 122.6(4) | C21-O2-C22  | 118.2(4) |
| C20-C21-C16              | 118.5(4) | N7-O3-Cu1   | 125.7(4) |

Symmetry codes: <sup>1</sup>  $1 - x, 2 - y, -z$ ; <sup>2</sup>  $1 - x, 1 - y, 3 - z$

**[ZnL<sup>1</sup>(NO<sub>3</sub>)<sub>2</sub>]<sub>n</sub> complex**

|                    |           |         |            |
|--------------------|-----------|---------|------------|
| C1-C2              | 1.378(3)  | C9-C10  | 1.495(3)   |
| C1-C6              | 1.392(3)  | C9-N1   | 1.355(2)   |
| C1-N3              | 1.439(2)  | C10-C11 | 1.514(3)   |
| C2-C3              | 1.380(3)  | C11-C12 | 1.516(3)   |
| C3-C4              | 1.388(3)  | C12-C13 | 1.516(3)   |
| C4-C4 <sup>2</sup> | 1.495(4)  | N1-N2   | 1.321(2)   |
| C4-C5              | 1.389(3)  | N1-Zn1  | 1.9985(17) |
| C5-C6              | 1.392(3)  | N2-N3   | 1.340(2)   |
| C6-O1              | 1.412(13) | N4-O2   | 1.287(3)   |
| C7-O1              | 1.385(18) | N4-O3   | 1.214(3)   |
| C8-C9              | 1.359(3)  | N4-O4   | 1.236(3)   |

|       |          |        |          |
|-------|----------|--------|----------|
| C8-N3 | 1.352(2) | O2-Zn1 | 1.996(3) |
|-------|----------|--------|----------|

Symmetry codes: <sup>1</sup> 1 - x, 2 - y, 1 - z

|                       |            |             |            |
|-----------------------|------------|-------------|------------|
| C2-C1-C6              | 119.50(19) | C9-C10-C11  | 114.69(18) |
| C2-C1-N3              | 119.15(18) | C10-C11-C12 | 110.9(18)  |
| C6-C1-N3              | 121.36(19) | C13-C12-C11 | 113.3 (2)  |
| C1-C2-C3              | 120.8(2)   | C9-N1-Zn1   | 127.32(14) |
| C2-C3-C4              | 120.9(2)   | N2-N1-C9    | 110.82(17) |
| C3-C4-C4 <sup>2</sup> | 121.6(2)   | N2-N1-Zn1   | 121.86(13) |
| C5-C4-C3              | 117.85(19) | N1-N2-N3    | 105.6(16)  |
| C5-C4-C4 <sup>2</sup> | 120.5(2)   | C8-N3-C1    | 131.64(17) |
| C4-C5-C6              | 121.78(19) | N2-N3-C1    | 117.37(17) |
| C5-C6-C1              | 119.1(2)   | N2-N3-C8    | 110.99(17) |
| O1-C6-C1              | 116.7(10)  | O3-N4-O2    | 121.9(3)   |
| O1-C6-C5              | 123.0(11)  | O3-N4-O4    | 125.1(3)   |
| N3-C8-C9              | 105.8(18)  | O4-N4-O2    | 112.9(3)   |
| C8-C9-C10             | 131.83(19) | C6-O1-C7    | 122.0(2)   |
| N1-C9-C8              | 106.80(18) | N4-O2-Zn1   | 109.4(2)   |
| N1-C9-C10             | 121.37(18) |             |            |

Symmetry codes: <sup>1</sup> 1 - x, 2 - y, 1 - z

## Compound L<sup>1</sup>

|         |           |         |           |
|---------|-----------|---------|-----------|
| C1-C2   | 1.408(9)  | C15-C16 | 1.371(7)  |
| C2-C3   | 1.549(8)  | C16-C17 | 1.383(7)  |
| C3-C4   | 1.466(7)  | C17-C18 | 1.388(7)  |
| C4-C5   | 1.485(7)  | C17-N3  | 1.422(6)  |
| C5-C6   | 1.345(13) | C18-C19 | 1.383(7)  |
| C5-N4   | 1.391(8)  | C18-O1  | 1.365(6)  |
| C6-N6   | 1.312(12) | C20-O1  | 1.421(6)  |
| C7-C8   | 1.365(6)  | C21-C22 | 1.343(8)  |
| C7-C12  | 1.386(6)  | C21-N3  | 1.331(6)  |
| C7-N6   | 1.423(6)  | C22-C23 | 1.504(8)  |
| C8-C9   | 1.371(7)  | C22-N1  | 1.355(7)  |
| C9-C10  | 1.397(7)  | C23-C24 | 1.492(10) |
| C10-C11 | 1.389(6)  | C24-C25 | 1.539(10) |
| C10-C14 | 1.481(7)  | C25-C26 | 1.529(10) |
| C11-C12 | 1.394(7)  | N1-N2   | 1.309(6)  |
| C12-O2  | 1.365(5)  | N2-N3   | 1.344(6)  |

|         |          |       |           |
|---------|----------|-------|-----------|
| C13-O2  | 1.420(6) | N4-N5 | 1.289(13) |
| C14-C15 | 1.381(7) | N5-N6 | 1.387(8)  |
| C14-C19 | 1.386(7) |       |           |

|             |           |             |           |
|-------------|-----------|-------------|-----------|
| C1-C2-C3    | 114.2(7)  | C16-C17-N3  | 119.4(5)  |
| C4-C3-C2    | 112.0(6)  | C18-C17-N3  | 122.3(5)  |
| C3-C4-C5    | 116.1(6)  | C19-C18-C17 | 120.1(5)  |
| C6-C5-C4    | 133.6(7)  | O1-C18-C17  | 116.5(5)  |
| N4-C5-C4    | 120.8(7)  | O1-C18-C19  | 123.4(5)  |
| N6-C6-C5    | 108.7(13) | C18-C19-C14 | 121.7(5)  |
| C8-C7-C12   | 119.0(5)  | N3-C21-C22  | 105.7(5)  |
| C8-C7-N6    | 119.5(5)  | C21-C22-C23 | 130.0(6)  |
| C12-C7-N6   | 121.5(5)  | C21-C22-N1  | 108.3(6)  |
| C7-C8-C9    | 122.0(5)  | N1-C22-C23  | 121.7(6)  |
| C8-C9-C10   | 120.3(5)  | C24-C23-C22 | 112.6(14) |
| C9-C10-C14  | 121.3(5)  | C23-C24-C25 | 108(2)    |
| C11-C10-C9  | 117.8(5)  | C26-C25-C24 | 110(3)    |
| C11-C10-C14 | 120.9(5)  | N2-N1-C22   | 108.7(5)  |
| C10-C11-C12 | 121.2(5)  | N1-N2-N3    | 106.8(5)  |
| C7-C12-C11  | 119.7(5)  | C21-N3-C17  | 130.3(5)  |
| O2-C12-C7   | 117.9(5)  | C21-N3-N2   | 110.4(5)  |
| O2-C12-C11  | 122.5(5)  | N2-N3-C17   | 119.2(5)  |
| C15-C14-C10 | 121.2(5)  | N5-N4-C5    | 110.4(9)  |
| C15-C14-C19 | 117.3(5)  | N4-N5-N6    | 106.2(8)  |
| C19-C14-C10 | 121.5(5)  | C6-N6-C7    | 134.4(7)  |
| C16-C15-C14 | 121.7(5)  | N5-N6-C7    | 115.5(6)  |
| C15-C16-C17 | 120.8(5)  | C18-O1-C20  | 118.4(5)  |
| C16-C17-C18 | 118.3(5)  | C12-O2-C13  | 119.7(4)  |

**[CuL<sup>1</sup>(NO<sub>3</sub>)<sub>2</sub>]<sub>n</sub> complex**

|                    |          |                     |          |
|--------------------|----------|---------------------|----------|
| C1-C2              | 1.378(5) | C9-C10              | 1.496(5) |
| C1-C6              | 1.399(5) | C9-N1               | 1.354(4) |
| C1-N3              | 1.440(4) | C10-C11             | 1.521(5) |
| C2-C3              | 1.383(5) | C11-C12             | 1.521(5) |
| C3-C4              | 1.388(5) | C12-C13             | 1.522(5) |
| C4-C4 <sup>2</sup> | 1.494(7) | Cu1-N1 <sup>1</sup> | 2.018(3) |

|       |          |                     |          |
|-------|----------|---------------------|----------|
| C4-C5 | 1.392(5) | Cu1-N1              | 2.018(3) |
| C5-C6 | 1.389(5) | Cu1-O4              | 1.959(3) |
| C6-O1 | 1.360(5) | Cu1-O4 <sup>1</sup> | 1.959(3) |
| C7-O1 | 1.427(4) | N1-N2               | 1.315(4) |
| C8-C9 | 1.367(5) | N2-N3               | 1.340(4) |
| C8-N3 | 1.359(4) |                     |          |

Symmetry codes: <sup>1</sup>  $2 - x, 1 - y, -z$ ; <sup>2</sup>  $2 - x, +y, \frac{1}{2} - z$

|                       |          |             |          |
|-----------------------|----------|-------------|----------|
| C2-C1-C6              | 119.3(3) | C9-C10-C11  | 114.6(3) |
| C2-C1-N3              | 118.7(3) | C10-C11-C12 | 111.1(3) |
| C6-C1-N3              | 121.9(3) | C13-C12-C11 | 112.8(3) |
| C3-C2-C1              | 120.7(3) | C9-N1-Cu1   | 133.2(2) |
| C4-C3-C2              | 121.4(3) | N2-N1-C9    | 111.0(3) |
| C3-C4-C4 <sup>2</sup> | 122.0(4) | N2-N1-Cu1   | 115.3(2) |
| C3-C4-C5              | 117.4(3) | N1-N2-N3    | 106.0(3) |
| C5-C4-C4 <sup>2</sup> | 120.6(4) | C8-N3-C1    | 131.6(3) |
| C6-C5-C4              | 122.0(3) | N2-N3-C1    | 117.7(3) |
| C5-C6-C1              | 119.1(3) | N2-N3-C8    | 110.7(3) |
| O1-C6-C1              | 116.7(3) | N3-C8-C9    | 105.5(3) |
| O1-C6-C5              | 124.1(3) | C8-C9-C10   | 130.6(3) |
| N1-C9-C10             | 122.6(3) | N1-C9-C8    | 106.7(3) |

Symmetry codes: <sup>1</sup>  $2 - x, 1 - y, -z$

## Compound L<sup>2</sup>

|         |          |         |          |
|---------|----------|---------|----------|
| C1-C2   | 1.370(3) | C17-C18 | 1.378(3) |
| C1-C6   | 1.371(3) | C18-C19 | 1.390(3) |
| C1-C7   | 1.464(3) | C18-O2  | 1.359(2) |
| C2-C3   | 1.376(3) | C19-C20 | 1.367(3) |
| C3-C4   | 1.354(3) | C19-N6  | 1.430(2) |
| C4-C5   | 1.358(3) | C20-C21 | 1.379(3) |
| C5-C6   | 1.381(3) | C22-O2  | 1.420(2) |
| C7-C8   | 1.357(3) | C23-C24 | 1.362(3) |
| C7-N1   | 1.350(3) | C23-N6  | 1.335(2) |
| C8-N3   | 1.339(2) | C24-C25 | 1.458(3) |
| C9-C10  | 1.371(3) | C24-N4  | 1.363(3) |
| C9-C14  | 1.390(3) | C25-C26 | 1.387(3) |
| C9-N3   | 1.426(2) | C25-C30 | 1.381(3) |
| C10-C11 | 1.372(3) | C26-C27 | 1.375(3) |

|         |          |         |          |
|---------|----------|---------|----------|
| C11-C12 | 1.385(3) | C27-C28 | 1.371(3) |
| C12-C13 | 1.385(3) | C28-C29 | 1.366(3) |
| C12-C16 | 1.481(3) | C29-C30 | 1.371(3) |
| C13-C14 | 1.386(3) | N1-N2   | 1.305(3) |
| C14-O1  | 1.358(2) | N2-N3   | 1.350(2) |
| C15-O1  | 1.419(3) | N4-N5   | 1.310(2) |
| C16-C17 | 1.388(3) | N5-N6   | 1.356(2) |
| C16-C21 | 1.384(3) |         |          |

|             |            |             |            |
|-------------|------------|-------------|------------|
| C2-C1-C6    | 117.6(2)   | O2-C18-C19  | 116.36(19) |
| C2-C1-C7    | 120.8(2)   | C18-C19-N6  | 119.05(19) |
| C6-C1-C7    | 121.6(2)   | C20-C19-C18 | 120.25(19) |
| C1-C2-C3    | 121.2(2)   | C20-C19-N6  | 120.7(2)   |
| C4-C3-C2    | 120.5(2)   | C19-C20-C21 | 120.6(2)   |
| C3-C4-C5    | 119.6(2)   | C20-C21-C16 | 120.2(2)   |
| C4-C5-C6    | 120.0(2)   | N6-C23-C24  | 106.2(2)   |
| C1-C6-C5    | 121.3(2)   | C23-C24-C25 | 130.1(2)   |
| C8-C7-C1    | 131.1(2)   | N4-C24-C23  | 107.19(19) |
| N1-C7-C1    | 121.7(2)   | N4-C24-C25  | 122.7(2)   |
| N1-C7-C8    | 107.25(19) | C26-C25-C24 | 120.6(2)   |
| N3-C8-C7    | 106.7(2)   | C30-C25-C24 | 121.4(2)   |
| C10-C9-C14  | 119.06(19) | C30-C25-C26 | 117.9(2)   |
| C10-C9-N3   | 118.39(19) | C27-C26-C25 | 120.7(2)   |
| C14-C9-N3   | 122.55(19) | C28-C27-C26 | 120.5(2)   |
| C11-C10-C9  | 121.3(2)   | C29-C28-C27 | 119.2(2)   |
| C10-C11-C12 | 120.8(2)   | C28-C29-C30 | 120.8(2)   |
| C11-C12-C13 | 117.79(19) | C29-C30-C25 | 120.9(2)   |
| C11-C12-C16 | 120.66(19) | N2-N1-C7    | 109.49(19) |
| C13-C12-C16 | 121.55(19) | N1-N2-N3    | 107.60(18) |
| C12-C13-C14 | 121.7(2)   | C8-N3-C9    | 132.89(19) |
| C13-C14-C9  | 119.29(19) | C8-N3-N2    | 108.96(17) |
| O1-C14-C9   | 117.16(18) | N2-N3-C9    | 118.07(18) |
| O1-C14-C13  | 123.5(2)   | N5-N4-C24   | 109.76(18) |
| C17-C16-C12 | 119.0(2)   | N4-N5-N6    | 106.52(17) |
| C21-C16-C12 | 122.2(2)   | C23-N6-C19  | 128.91(18) |
| C21-C16-C17 | 118.8(2)   | C23-N6-N5   | 110.36(17) |
| C18-C17-C16 | 121.2(2)   | N5-N6-C19   | 120.72(18) |
| C17-C18-C19 | 118.9(2)   | C14-O1-C15  | 118.51(17) |



|            |          |            |            |
|------------|----------|------------|------------|
| O2-C18-C17 | 124.7(2) | C18-O2-C22 | 117.90(17) |
|------------|----------|------------|------------|

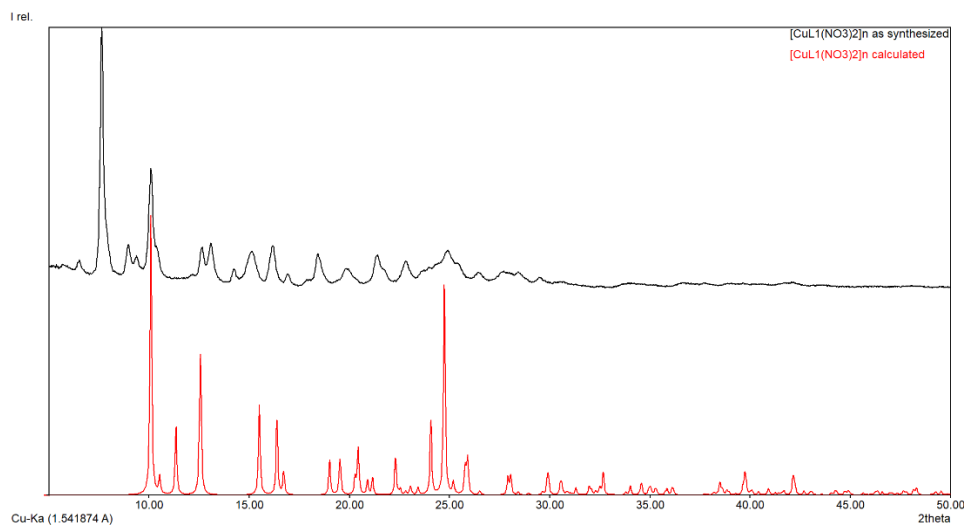

**Figure S15.** Powder XRD for  $[\text{CuL}^1(\text{NO}_3)_2]_n$  complex. According to the EPR analysis, the large peak at approximately  $7.6^\circ 2\theta$  indicates the presence of binuclear complexes corresponding to dimers.

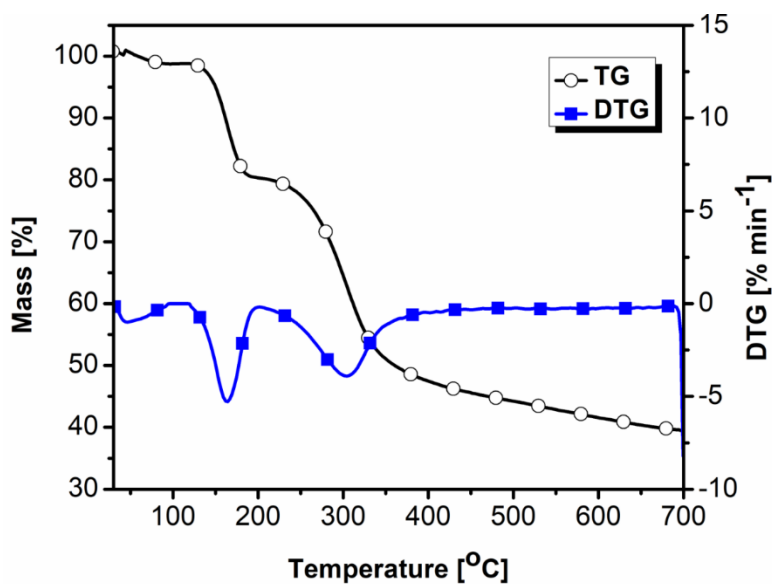

**Figure S16.** TG-DTG curves of bisazide 2.

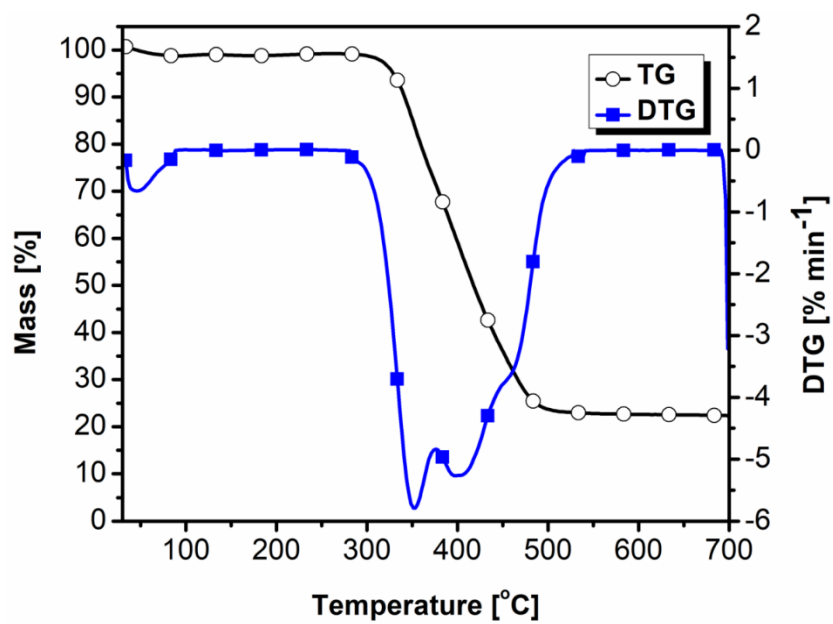

Figure S17. TG-DTG curves of ligand L<sup>1</sup>.

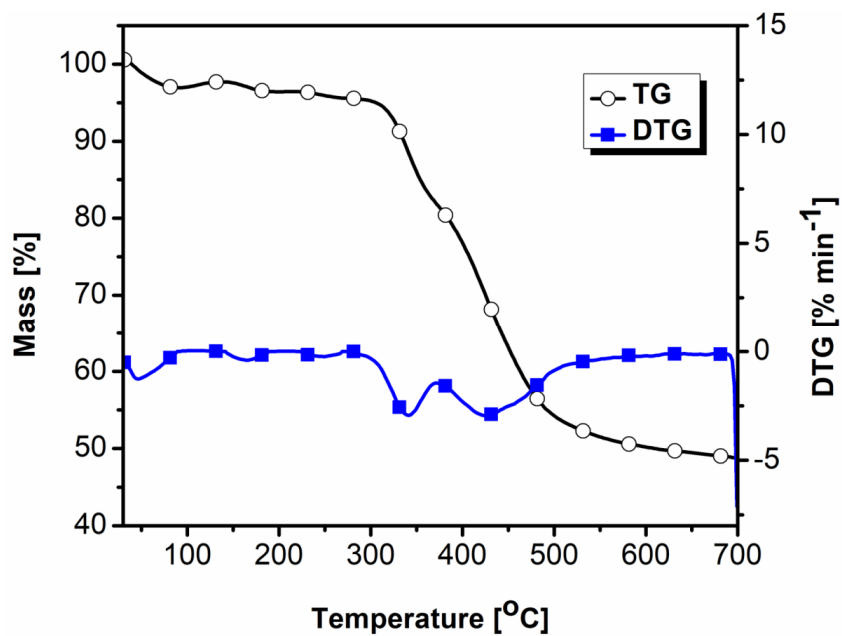

Figure S18. TG-DTG curves of ligand L<sup>2</sup>.

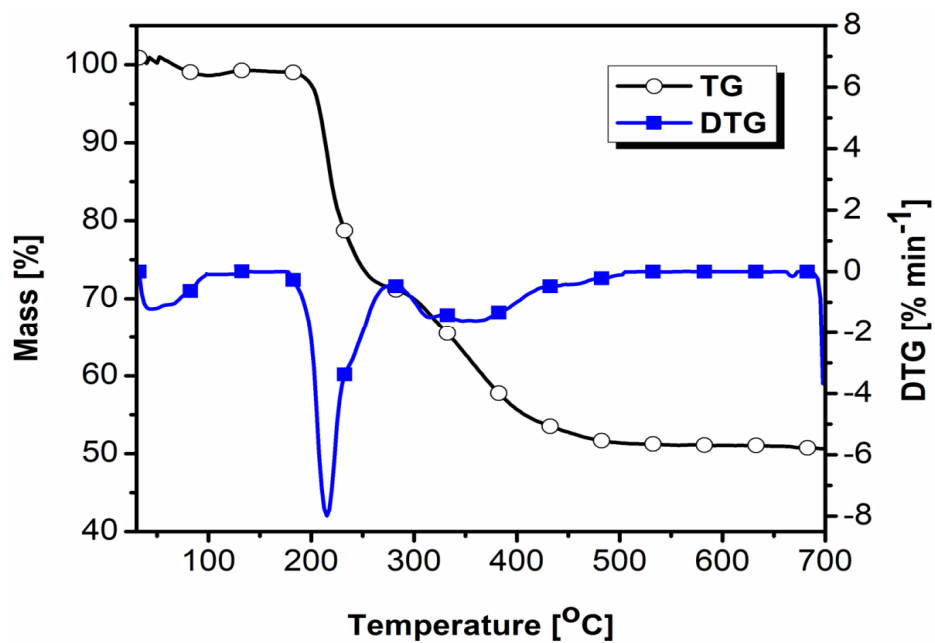

Figure S19. TG-DTG curves of  $[\text{CuL}^1(\text{NO}_3)_2]_n$ .

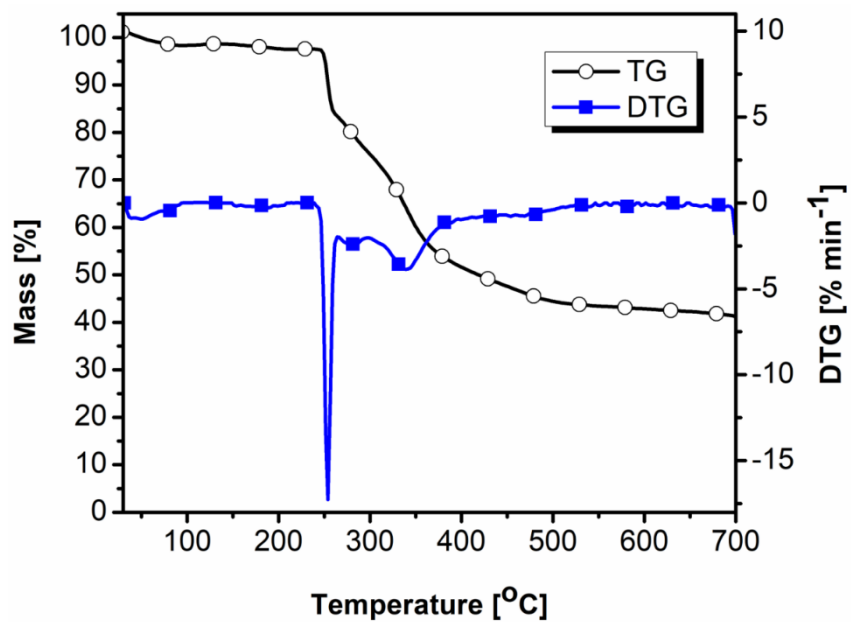

Figure S20. TG-DTG curves of  $[\text{ZnL}^1(\text{NO}_3)_2]_n$ .

**Table S2.** Data extracted from TG-DTG experiments.

| Sample                                                           | Stage | $T_{\text{onset}}$<br>(°C) | $T_{\text{max}}$<br>(°C) | $T_{\text{endset}}$<br>(°C) | $W_{\text{m}}$<br>(%) | $W_{\text{rez}}$<br>(%) |
|------------------------------------------------------------------|-------|----------------------------|--------------------------|-----------------------------|-----------------------|-------------------------|
| <b>Bisazide 2</b>                                                | I     | 31                         | 46                       | 84                          | 2.08                  | 39.04                   |
|                                                                  | II    | 133                        | 164                      | 183                         | 18.93                 |                         |
|                                                                  | III   | 246                        | 304                      | 339                         | 39.36                 |                         |
| <b>Ligand L<sup>1</sup></b>                                      | I     | 33                         | 45                       | 77                          | 1.11                  | 22                      |
|                                                                  | II    | 318                        | 352                      | 366                         | 25.44                 |                         |
|                                                                  | III   | 366                        | 400                      | 424                         | 27.85                 |                         |
|                                                                  | IV    | 424                        | 459                      | 481                         | 23.52                 |                         |
| <b>Ligand L<sup>2</sup></b>                                      | I     | 29                         | 46                       | 83                          | 2.97                  | 48.28                   |
|                                                                  | II    | 148                        | 165                      | 184                         | 1.18                  |                         |
|                                                                  | III   | 229                        | 248                      | 264                         | 0.88                  |                         |
|                                                                  | IV    | 307                        | 341                      | 354                         | 12.96                 |                         |
|                                                                  | V     | 377                        | 425                      | 491                         | 32.89                 |                         |
| [CuL <sup>1</sup> (NO <sub>3</sub> ) <sub>2</sub> ] <sub>n</sub> | I     | 32                         | 44                       | 104                         | 2.56                  | 49.88                   |
|                                                                  | II    | 201                        | 215                      | 224                         | 18.01                 |                         |
|                                                                  | III   | 224                        | 239                      | 258                         | 8.10                  |                         |
|                                                                  | IV    | 296                        | 316                      | 397                         | 15.38                 |                         |
|                                                                  | V     | 397                        | 457                      | 476                         | 5.91                  |                         |
| [ZnL <sup>1</sup> (NO <sub>3</sub> ) <sub>2</sub> ] <sub>n</sub> | I     | 41                         | 39                       | 88                          | 1.42                  | 41.02                   |
|                                                                  | II    | 150                        | 190                      | 209                         | 1.01                  |                         |
|                                                                  | III   | 248                        | 254                      | 257                         | 14.65                 |                         |
|                                                                  | IV    | 270                        | 284                      | 301                         | 9.18                  |                         |
|                                                                  | V     | 317                        | 339                      | 366                         | 18.76                 |                         |
|                                                                  | VI    | 366                        | 470                      | 500                         | 13.89                 |                         |

$T_{\text{onset}}$  – onset thermal degradation temperature;

$T_{\text{max}}$  – temperature that corresponds to the maximum rate of decomposition for each stage evaluated from the peaks of the DTG curves;

$T_{\text{endset}}$  – endset thermal degradation temperature;

$W_{\text{m}}$  – mass loss rate corresponding to each thermal degradation stage;

$W_{\text{rez}}$  – percentage of residue remained at the end of the thermal degradation process (700°C).

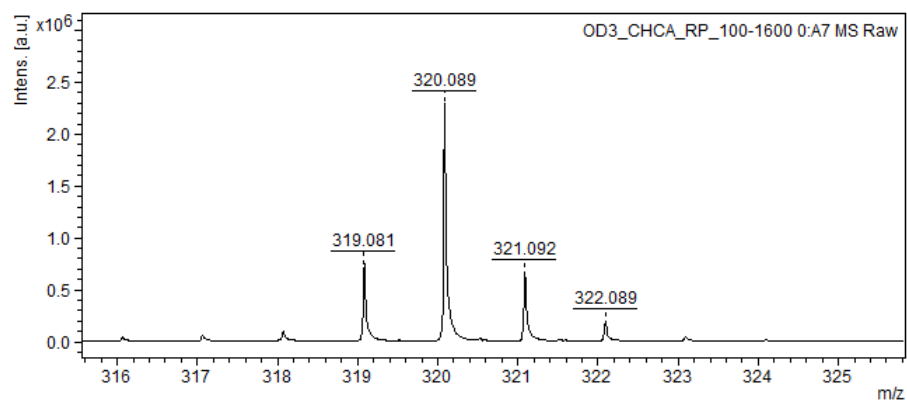

**Figure S21.** Maldi-MS spectrum of bisazide 2.

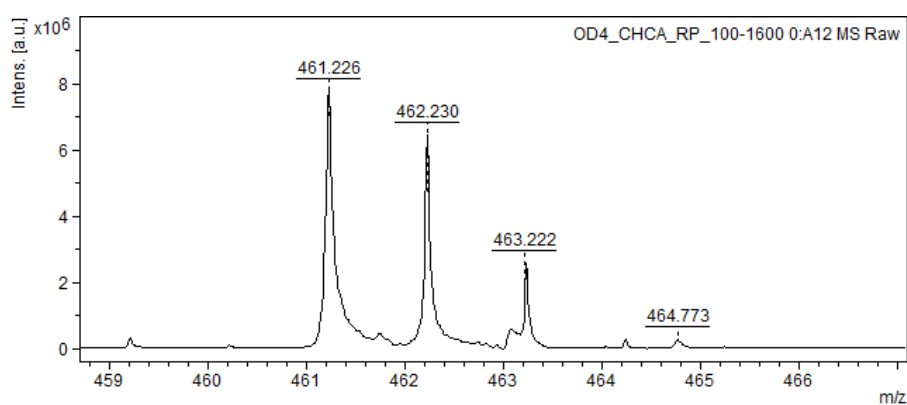

**Figure S22.** Maldi-MS spectrum of L<sup>1</sup>.

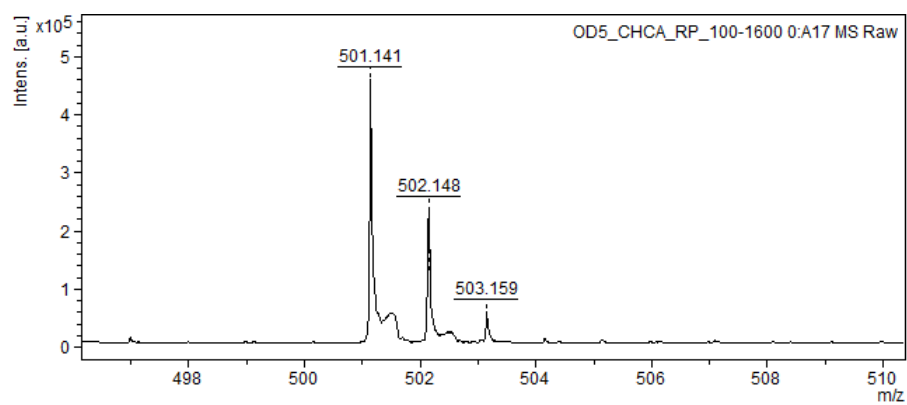

**Figure S23.** Maldi-MS spectrum of L<sup>2</sup>.

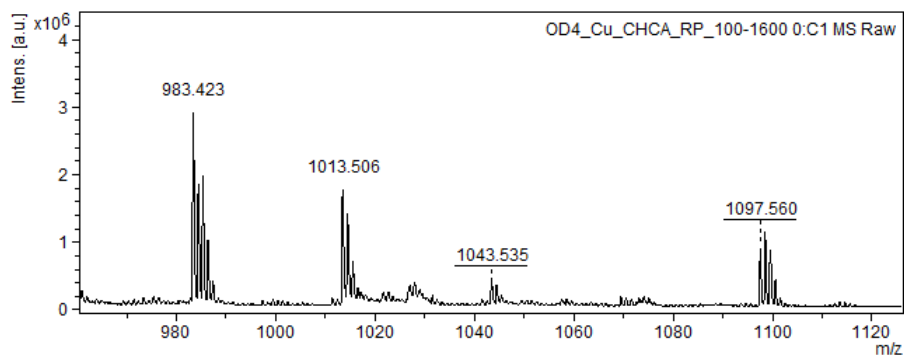

**Figure S24.** Maldi-MS spectrum of  $[\text{CuL}^1(\text{NO}_3)_2]_n$ .

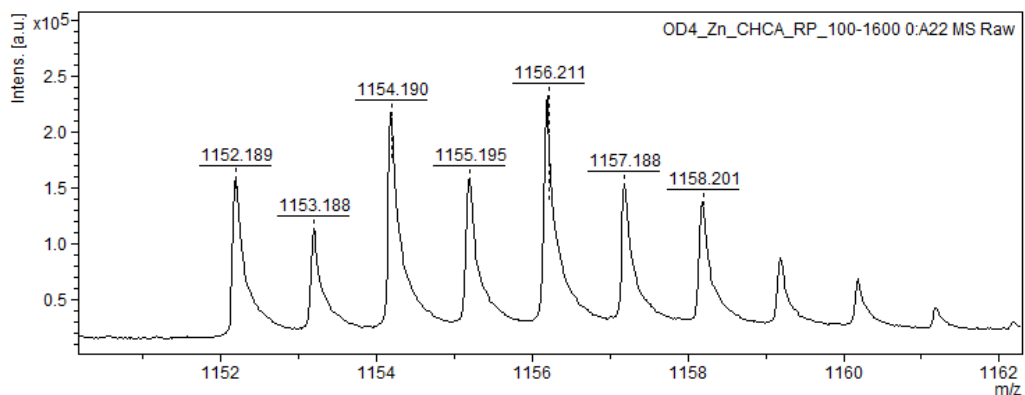

**Figure S25.** Maldi-MS spectrum of  $[\text{ZnL}^1(\text{NO}_3)_2]_n$ .

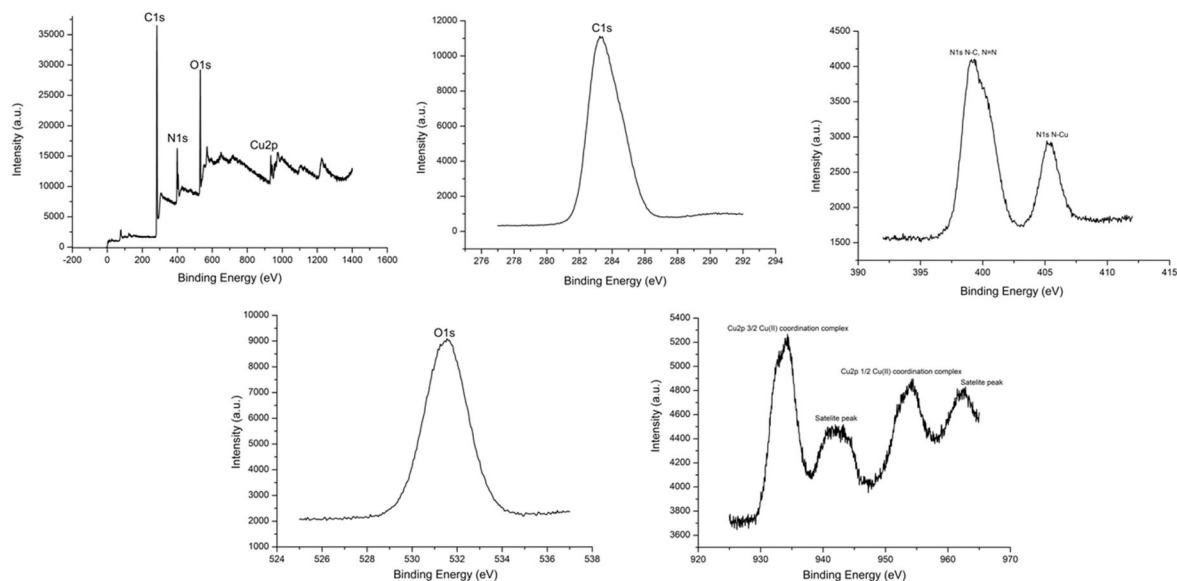

**Figure S26.** XPS spectra of  $[\text{CuL}^1(\text{NO}_3)_2]_n$ , full scan, C1s, N1s, O1s and Cu2p (in this order).

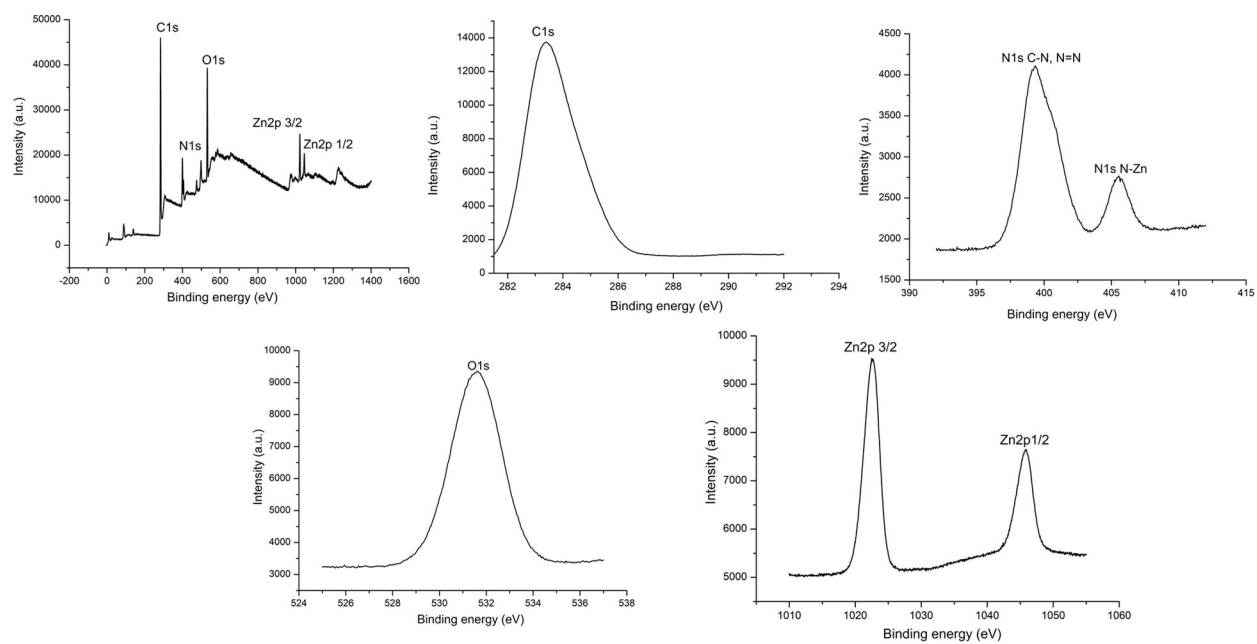

**Figure S27.** XPS spectra of  $[\text{ZnL}^1(\text{NO}_3)_2]_n$ , full scan,  $\text{C1s}$ ,  $\text{N1s}$ ,  $\text{O1s}$  and  $\text{Zn2p}$  (in this order).
